# Supplementary material for: Bimetallic Au@Rh core–shell nanostars with plasmon-enhanced catalytic performance in hydrogen evolution reaction
Source: Royal Society of Chemistry journal article supplement (doi:10.1039/d2ce01630c), 2023-01-01
Supplement: d2ce01630c1.pdf [file d2ce01630c1.pdf]

## Electronic Supporting Information

### **Bimetallic Au@Rh core-shell nanostars with plasmon-enhanced catalytic performance in hydrogen evolution reaction**

Xin Wu, Xingzhong Zhu\*, Caixia Kan\*, and Daning Shi<sup>[a]</sup>

a. College of Physics, MIIT Key Laboratory of Aerospace Information Materials and Physics, Key Laboratory for Intelligent Nano Materials and Devices, Nanjing University of Aeronautics and Astronautics, No. 29 Jiangjun Road, Nanjing 211106, P. R. China.

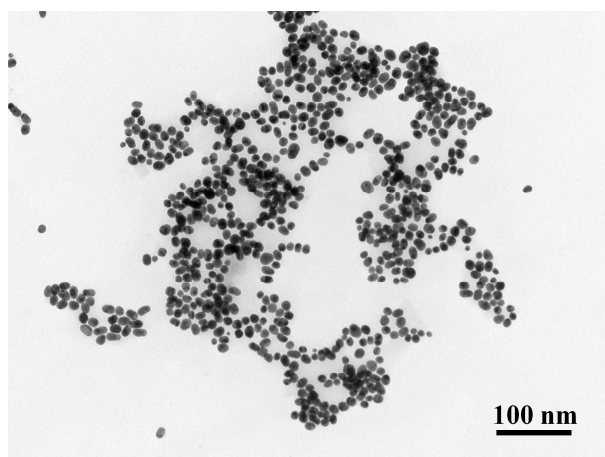

**Figure S1** Au nanoparticles were used for the synthesis of Au nanostars.

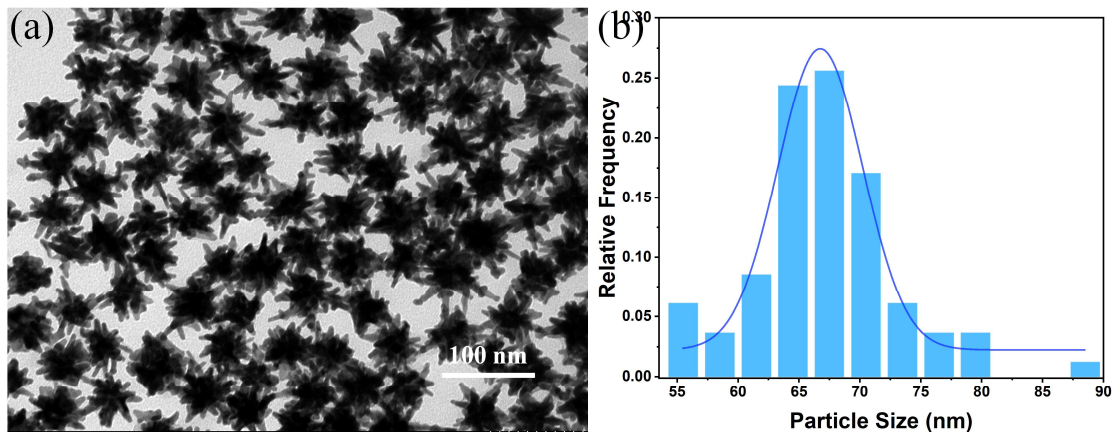

**Figure S2** The as-prepared Au nanostars (a) and their size distribution (b).

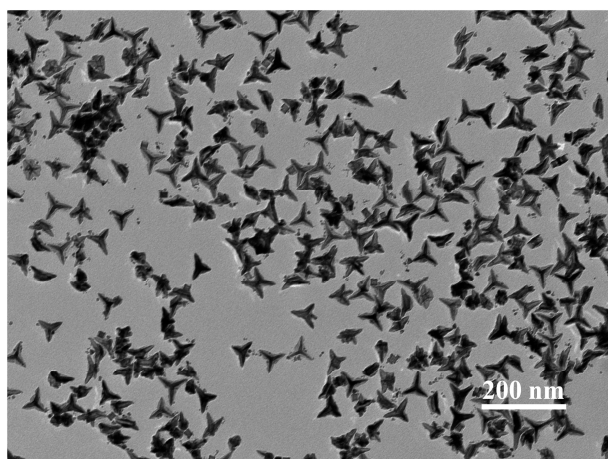

**Figure S3** TEM image of Rh MPs.

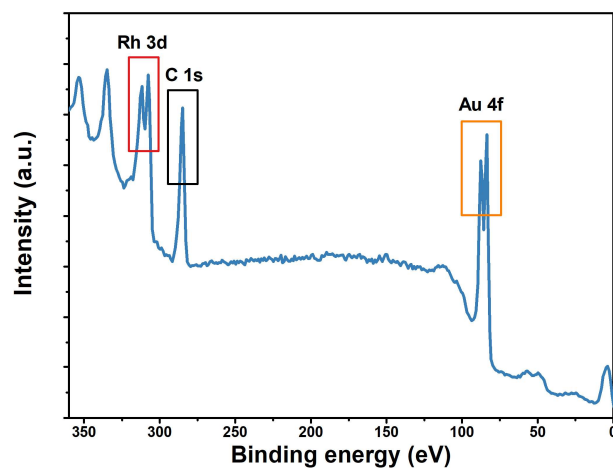

**Figure S4** XPS survey spectrum of Au@Rh nanostars.

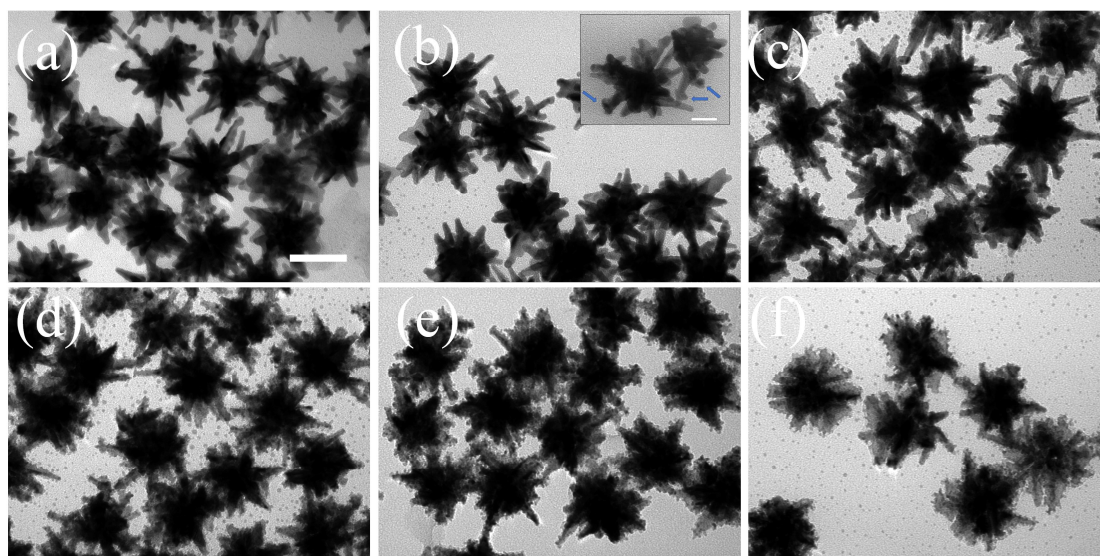

**Figure S5** TEM images show the morphology evolution of Au@Rh nanostars with reaction time. The reaction time was (a) 0, (b) 1, (c) 2, (d) 4, (e) 6 and (f) 8 h. Scale bar for (a-f) is 50 nm. The inset of (b) shows a TEM image of a single Au@Rh nanostar particle consisting of Rh clusters on the Au nanostar, scale bar: 20 nm.

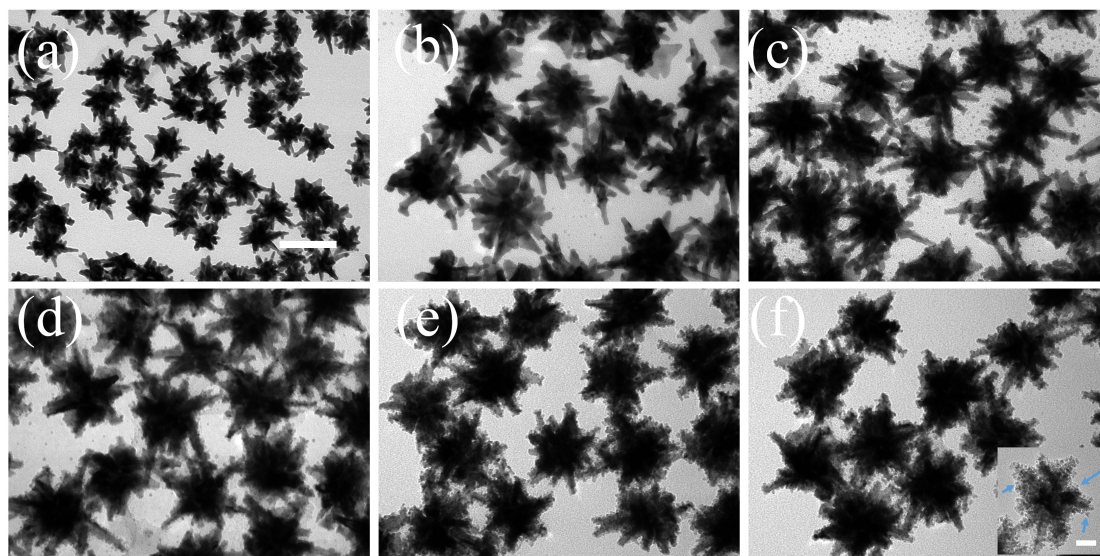

**Figure S6** TEM images showing the morphology evolution of Au@Rh nanostars. The added volume Rh precursor was (a) 25, (b) 35, (c) 50, (d) 75, (e) 100 and (f) 125  $\mu\text{L}$ . Scale bar for (a-f) is 50 nm. The inset of (f) shows a TEM image of a single Au@Rh nanostar particle consisting of Rh clusters on the Au nanostar, scale bar: 20 nm.

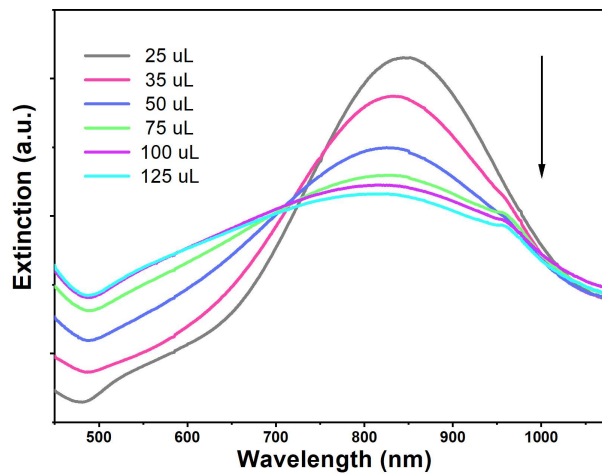

**Figure S7** UV-vis spectra of Au@Rh nanostars with the increased amount of Rh precursor.



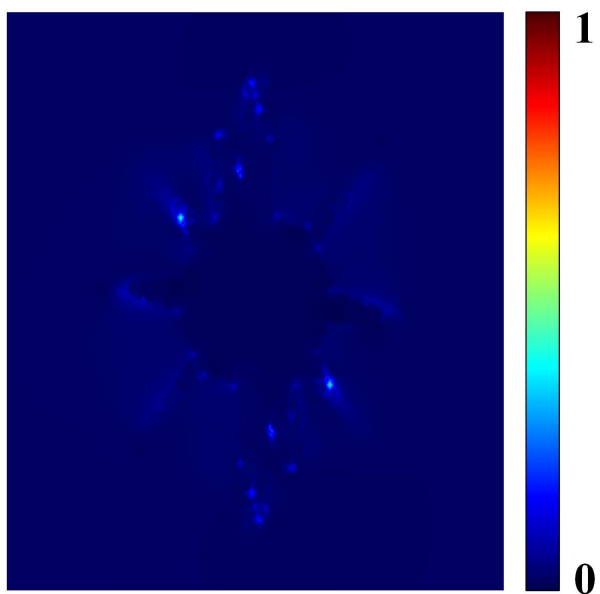

**Figure S8** E-M field distribution of Au nanostar when the outside Rh clusters replaced by the Rh shells.

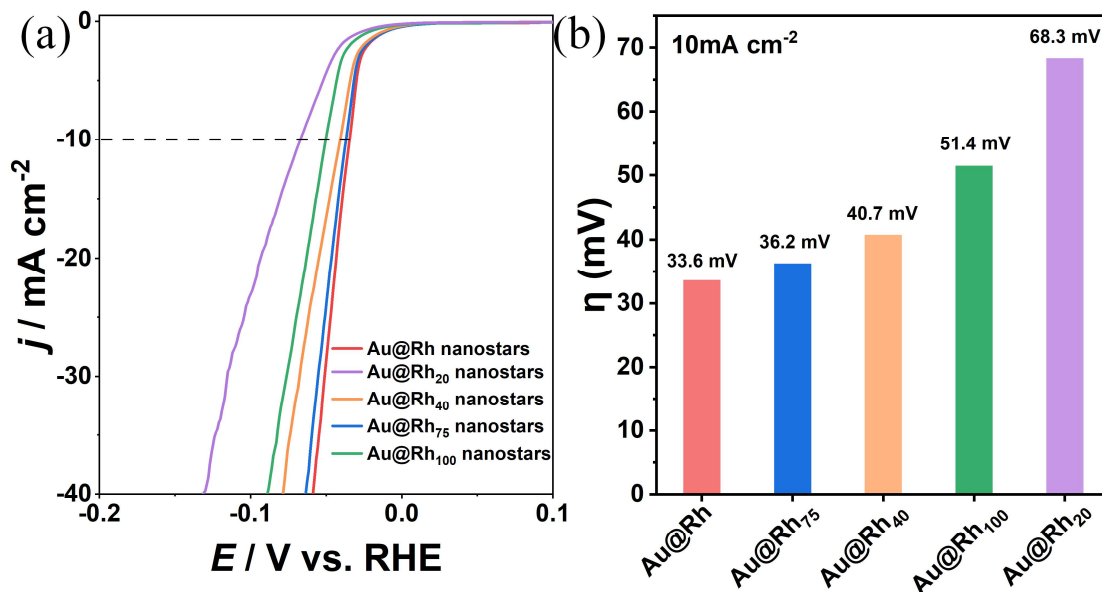

**Figure S9** (a) The polarization curves of samples with adding different volume Rh precursor in 0.5 M H<sub>2</sub>SO<sub>4</sub> solution and (b) the overpotentials of various catalysts at 10 mA cm<sup>-2</sup>.

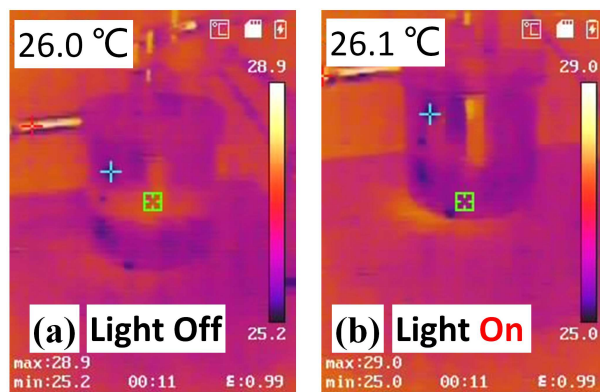

**Figure S10** There were no significant changes in the temperature of the working electrode during the HER with (a) or without (b) the 808 nm laser illumination.

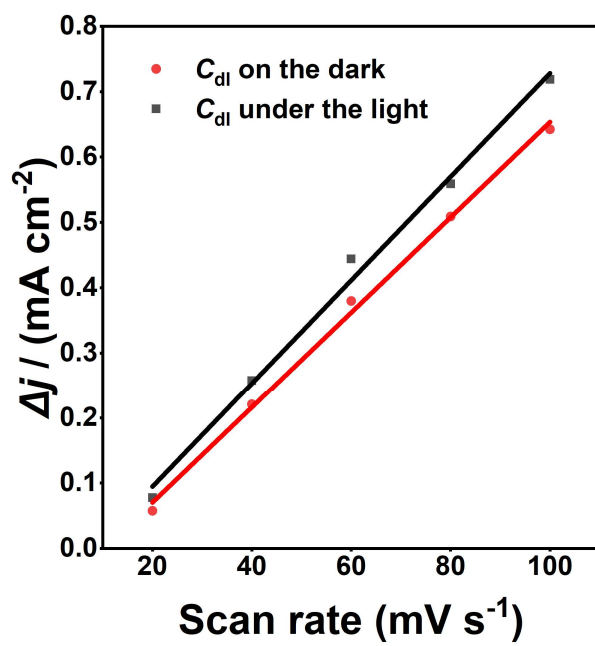

**Figure S11** C<sub>dl</sub> of Au@Rh nanostars under laser illumination and dark condition.

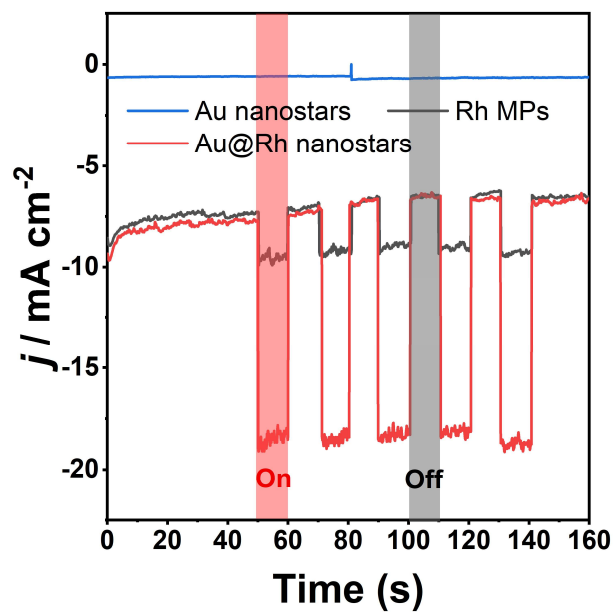

**Figure S12** on-off  $j-t$  transients for Au nanostars, Rh MPs and Au@Rh nanostars with and without laser irradiation, respectively.

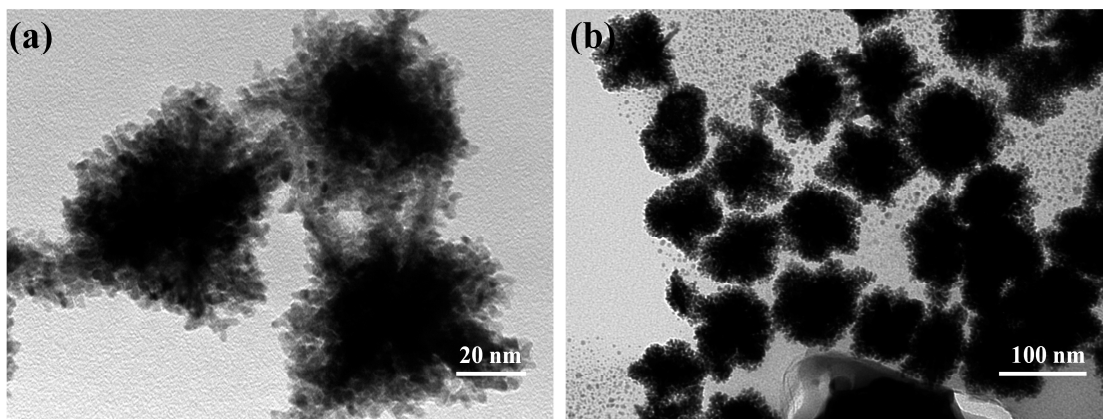

**Figure S13** TEM images of Au@Rh nanostars before (a) and after (b) 5000 cycles of photo-electrocatalysis.

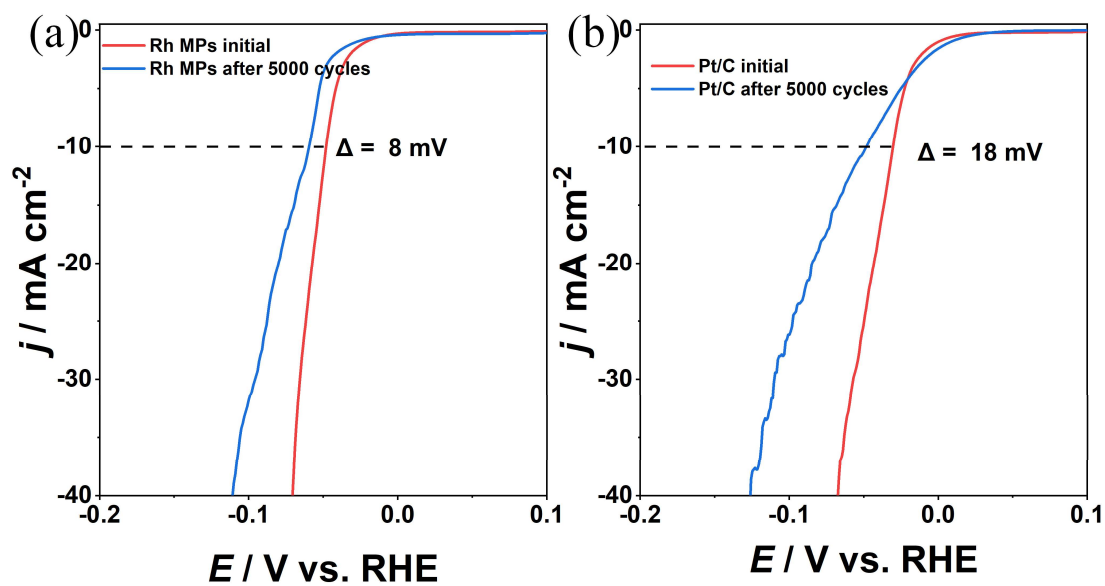

**Figure S14** LSV polarization curves of Rh MPs (a) and Pt/C (b) before and after 5000 cycles of photo-electrocatalysis.

| Element | Mass ratio % | Atom ratio % |
|---------|--------------|--------------|
| Rh      | 48.2         | 64.04        |
| Au      | 51.8         | 35.96        |

**Table S1** SEM-EDS data of Au@Rh nanostars.



| Catalysts                                     | Electrolyte                              | Overpotential at<br>10 mA cm <sup>-2</sup> (mV) | Tafel slope<br>(mV dec <sup>-1</sup> ) | Ref.                 |
|-----------------------------------------------|------------------------------------------|-------------------------------------------------|----------------------------------------|----------------------|
| <b>Au@Rh nanostars<br/>Under 808 nm light</b> | <b>0.5 M H<sub>2</sub>SO<sub>4</sub></b> | <b>28.5</b>                                     | <b>29.3</b>                            | <b>This<br/>work</b> |
| Rh/F-graphene                                 | 0.5 M H <sub>2</sub> SO <sub>4</sub>     | 46                                              | 30                                     | 1                    |
| Rh-MoS <sub>2</sub>                           | 0.5 M H <sub>2</sub> SO <sub>4</sub>     | 47                                              | 24                                     | 2                    |
| Rh@CTF-1                                      | 0.5 M H <sub>2</sub> SO <sub>4</sub>     | 58                                              | 37                                     | 3                    |
| RhCoB aerogels                                | 0.5 M H <sub>2</sub> SO <sub>4</sub>     | 12                                              | 30.7                                   | 4                    |
| Rh-Au-Si<br>nanocomposite                     | 0.5 M H <sub>2</sub> SO <sub>4</sub>     | 60                                              | 24                                     | 5                    |
| PtRh DNAs                                     | 0.5 M H <sub>2</sub> SO <sub>4</sub>     | 27                                              | 30                                     | 6                    |
| Rh-Ag-Si ternary<br>composites                | 0.5 M H <sub>2</sub> SO <sub>4</sub>     | 120                                             | 51                                     | 7                    |
| boron-doped RhFe<br>alloy                     | 0.5 M H <sub>2</sub> SO <sub>4</sub>     | 25                                              | 32                                     | 8                    |

**Table S2** Comparison of HER activities in 0.5 M H<sub>2</sub>SO<sub>4</sub> for Au@Rh nanostars with other reported Rh-based electrocatalysts.

## References

1. W. Shen, L. Ge, Y. Sun, F. Liao, L. Xu, Q. Dang, Z. Kang and M. Shao, *ACS Appl. Mater. Interfaces*, 2018, **10**, 33153-33161.
2. Y. Cheng, S. Lu, F. Liao, L. Liu, Y. Li and M. Shao, *Adv. Funct. Mater.*, 2017, **27**, 1700359.
3. M. Siebels, C. Schlusener, J. Thomas, Y. X. Xiao, X. Y. Yang and C. Janiak, *J. Mater. Chem. A*, 2019, **7**, 11934-11943.
4. K. Deng, T. Ren, Y. Xu, S. Liu, Z. Dai, Z. Wang, X. Li, L. Wang and H. Wang, *J. Mater. Chem. A*, 2020, **8**, 5595-5600.
5. B. B. Jiang, L. L. Yang, F. Liao, M. Q. Sheng, H. Z. Zhao, H. P. Lin and M. W. Shao, *Nano Research*, 2017, **10**, 1749-1755.
6. Y. Liu, X. Li, Q. Zhang, W. Li, Y. Xie, H. Liu, L. Shang, Z. Liu, Z. Chen, L. Gu, Z. Tang, T. Zhang and S. Lu, *Angew Chem. Int. Ed. Engl.*, 2020, **59**, 1718-1726.
7. B. Jiang, Y. Sun, F. Liao, W. Shen, H. Lin, H. Wang and M. Shao, *J. Mater. Chem. A*, 2017, **5**, 1623-1628.
8. L. S. Zhang, J. J. Lu, S. B. Yin, L. Luo, S. Y. Jing, A. Brouzgou, J. H. Chen, P. K. Shen and P. Tsiakaras, *Appl. Catal. B-Environ.*, 2018, **230**, 58-64.
